# Supplementary material
Source: publisher figshare collection journal article supplement (https://geolsoc.figshare.com/ndownloader/files/28250015)
Supplement: Supplementary file 1 [file 28250015]

Table 7. Apatite U-Pb geochronology Bridges of Ross
Sample 411A		Bridges of Ross		GPS coordinates:			52.5914679	-9.8750846
Apatite	207U/235Pb	2 Sigma	206U/238Pb	2 Sigma	Rho	238U/206Pb	2 Sigma	207Pb/206Pb	2 Sigma	Rho	206Pb/238U (Ma)	2 Sigma (Ma)	207Pb/235U (Ma)	2 Sigma (Ma)	207Pb/206Pb (Ma)	2 Sigma (Ma)	207Pb corrected Age (Ma)	2 Sigma (Ma)	U (ppm)	% error
X411A_21	2.108	0.073	0.1077	0.0024	0.3	9.29	0.21	0.1431	0.0047	0.22	659	15	1151	40	2265	74	595	13	1.9	2.3
X411A_3	1.607	0.041	0.0734	0.0017	0.46	13.62	0.32	0.1579	0.003	0.39	457	11	973	25	2433	46	400	9.3	7.1	2.3
X411A_57	1.722	0.071	0.1055	0.0025	0.2	9.48	0.22	0.1175	0.0042	0.22	647	15	1017	42	1919	69	603	14	2.4	2.4
X411A_60	1.654	0.06	0.0785	0.0018	-0.044	12.74	0.29	0.1501	0.0056	0.44	487	11	991	36	2347	88	432	10	3.1	2.4
X411A_1	10.5	0.42	0.397	0.01	0.85	2.519	0.063	0.1901	0.0045	-0.51	2155	54	2480	99	2743	65	2016	52	1.1	2.6
X411A_15	3.76	0.11	0.0907	0.0022	0.65	11.03	0.27	0.3017	0.0061	-0.03	560	14	1584	46	3479	70	393	10	2.7	2.6
X411A_38	4.42	0.19	0.1364	0.0033	0.07	7.33	0.18	0.2325	0.0096	0.39	824	20	1716	74	3069	127	661	18	0.91	2.8
X411A_23	5.43	0.19	0.1078	0.0025	0.32	9.28	0.22	0.3715	0.009	0.3	660	15	1890	66	3798	92	409	12	1.4	3
X411A_51	2.66	0.16	0.1104	0.0031	0.56	9.06	0.25	0.1788	0.0084	-0.14	675	19	1317	79	2642	124	581	17	5.9	3
X411A_4	7.28	0.21	0.368	0.011	0.74	2.718	0.081	0.1447	0.0029	0.47	2020	60	2146	62	2284	46	1973	59	2	3
X411A_27	8.06	0.24	0.1511	0.0038	0.55	6.62	0.17	0.3854	0.0082	0.23	907	23	2238	67	3853	82	559	17	4.1	3
X411A_34	1.959	0.09	0.0792	0.0023	0.18	12.63	0.37	0.1756	0.0081	0.37	491	14	1102	51	2612	120	421	13	0.41	3.1
X411A_53	4.57	0.17	0.1076	0.0031	0.48	9.29	0.27	0.3024	0.0092	0.28	659	19	1744	65	3483	106	466	15	1.2	3.3
X411A_63	5.09	0.18	0.105	0.0026	0.37	9.52	0.24	0.353	0.011	0.21	644	16	1834	65	3720	116	414	14	2.3	3.3
X411A_24	2.36	0.26	0.1058	0.0031	0.71	9.45	0.28	0.156	0.013	-0.5	648	19	1231	136	2413	201	575	19	0.88	3.4
X411A_11	4.18	0.17	0.1274	0.004	0.34	7.85	0.25	0.2367	0.0097	0.31	773	24	1670	68	3098	127	614	21	0.87	3.4
X411A_7	7.56	0.34	0.126	0.0039	0.8	7.94	0.25	0.4252	0.008	-0.19	765	24	2180	98	4001	75	427	15	1.8	3.6
X411A_16	5.04	0.27	0.1274	0.004	0.5	7.85	0.25	0.283	0.012	0.052	773	24	1826	98	3380	143	570	21	0.67	3.7
X411A_59	6.08	0.32	0.1409	0.0046	0.65	7.1	0.23	0.306	0.011	-0.13	850	28	1987	105	3501	126	606	23	0.94	3.7
X411A_45	8.21	0.29	0.1366	0.0038	0.5	7.32	0.2	0.43	0.011	0.21	825	23	2254	80	4017	103	458	17	0.53	3.8
X411A_52	3.77	0.17	0.1048	0.0036	0.49	9.54	0.33	0.258	0.011	0.22	642	22	1586	72	3235	138	489	19	0.93	3.8
X411A_5	22.12	0.56	0.2807	0.0061	0.46	3.563	0.077	0.5734	0.0085	0.38	1595	35	3189	81	4442	66	645	25	0.51	3.8
X411A_50	6.5	0.29	0.1518	0.0049	0.69	6.59	0.21	0.311	0.014	-0.25	911	29	2046	91	3526	159	647	26	0.42	4
X411A_22	3.05	0.23	0.1032	0.0039	0.54	9.69	0.37	0.213	0.014	-0.046	633	24	1420	107	2929	192	517	22	0.4	4.2
X411A_40	7.29	0.3	0.1231	0.0037	0.26	8.12	0.24	0.424	0.015	0.4	748	22	2148	88	3996	141	418	19	0.74	4.5
X411A_43	7.44	0.28	0.132	0.0046	0.43	7.58	0.26	0.406	0.015	0.35	799	28	2166	82	3931	145	467	22	0.19	4.7
X411A_48	7.95	0.39	0.1275	0.0035	0.56	7.84	0.22	0.452	0.016	0.045	774	21	2225	109	4092	145	405	19	1.5	4.8
X411A_29	6.18	0.45	0.1404	0.0066	0.85	7.12	0.33	0.315	0.013	-0.44	847	40	2002	146	3546	146	594	30	2.6	5.1
X411A_56	11.72	0.52	0.1597	0.0059	0.71	6.26	0.23	0.534	0.012	-0.036	955	35	2582	115	4338	97	406	22	1.2	5.3
X411A_58	13.09	0.5	0.2076	0.0084	0.37	4.82	0.19	0.457	0.016	0.51	1216	49	2686	103	4108	144	658	36	0.97	5.5
X411A_2	12.13	0.45	0.1642	0.0052	0.6	6.09	0.19	0.534	0.017	0.24	980	31	2615	97	4338	138	418	26	0.66	6.1
X411A_13	10.09	0.38	0.1525	0.0057	0.33	6.56	0.25	0.482	0.019	0.58	915	34	2443	92	4187	165	450	28	0.56	6.2
X411A_9	11.72	0.6	0.1679	0.0079	0.81	5.96	0.28	0.508	0.016	0.16	1001	47	2582	132	4265	134	462	30	0.5	6.5
X411A_33	15.4	1.3	0.232	0.013	0.84	4.31	0.24	0.473	0.019	-0.22	1345	75	2840	240	4159	167	710	50	0.31	7.1
X411A_28	14.88	0.7	0.2094	0.0073	0.23	4.78	0.17	0.517	0.023	0.49	1226	43	2808	132	4290	191	566	41	0.14	7.3
X411A_17	19.48	0.77	0.235	0.0075	0.26	4.26	0.14	0.592	0.02	0.45	1361	43	3066	121	4488	152	498	40	0.39	8
X411A_36	11.3	1	0.186	0.011	0.77	5.38	0.32	0.44	0.025	-0.36	1100	65	2548	226	4052	230	612	49	0.77	8.1
X411A_10	22.29	0.89	0.2727	0.0098	0.44	3.67	0.13	0.591	0.021	0.43	1554	56	3196	128	4486	159	586	48	0.15	8.2
X411A_31	14.92	0.66	0.1869	0.0059	0.4	5.35	0.17	0.576	0.022	0.2	1105	35	2810	124	4449	170	415	35	0.086	8.3
X411A_32	9.84	0.59	0.1558	0.006	-0.02	6.42	0.25	0.457	0.032	0.56	933	36	2420	145	4108	288	490	42	0.11	8.5
X411A_6	7.6	1.2	0.157	0.01	0.86	6.37	0.41	0.342	0.033	-0.58	940	60	2185	345	3672	354	632	55	0.35	8.6
X411A_46	27.3	0.99	0.2923	0.009	0.56	3.42	0.11	0.668	0.018	0.32	1653	51	3394	123	4663	126	444	44	0.34	10
X411A_12	23.6	1	0.276	0.011	0.69	3.63	0.14	0.626	0.023	0.23	1569	63	3254	138	4570	168	513	53	0.22	10.3
X411A_35	26.2	1	0.2829	0.0085	0.61	3.53	0.11	0.669	0.019	0.27	1606	48	3355	128	4666	133	426	45	0.25	10.5
X411A_8	26.1	1.1	0.2821	0.0084	0.6	3.54	0.11	0.662	0.02	0.12	1602	48	3351	141	4650	140	442	46	0.44	10.5
X411A_26	21.8	1.3	0.268	0.012	0.5	3.73	0.17	0.589	0.03	0.38	1531	69	3175	189	4481	228	580	65	0.074	11.3
X411A_62	8.77	0.62	0.1437	0.0077	0.05	6.96	0.37	0.47	0.041	0.59	866	46	2314	164	4150	362	437	50	0.16	11.5
X411A_37	8.49	0.56	0.1272	0.0079	0.07	7.86	0.49	0.484	0.038	0.5	772	48	2285	151	4193	329	372	44	0.039	11.7
X411A_61	21.4	1.1	0.257	0.016	0.97	3.89	0.24	0.617	0.026	-0.09	1474	92	3157	162	4549	192	495	59	0.52	12
X411A_44	9.26	0.73	0.129	0.0072	0.36	7.75	0.43	0.537	0.037	0.32	782	44	2364	186	4346	299	323	41	0.065	12.7
X411A_55	9.89	0.81	0.15	0.01	0.04	6.67	0.44	0.503	0.051	0.62	901	60	2425	199	4250	431	418	64	0.037	15.4
X411A_54	74.2	2.4	0.71	0.023	0.46	1.408	0.046	0.748	0.022	0.56	3458	112	4387	142	4826	142	729	120	0.14	16.5
X411A_18	37.1	1.9	0.39	0.015	0.57	2.56	0.1	0.697	0.029	0.29	2123	82	3696	189	4725	197	516	89	0.24	17.1
X411A_14	24.1	1.1	0.267	0.0078	0.1	3.75	0.11	0.67	0.037	0.45	1526	45	3272	149	4668	258	397	77	0.41	19.4
X411A_42	37.3	2.7	0.384	0.021	0.65	2.6	0.14	0.684	0.038	-0.0023	2095	115	3702	268	4697	261	551	113	0.38	20.6
X411A_49	38.5	2.7	0.4	0.023	0.53	2.5	0.14	0.685	0.039	0.46	2169	125	3733	262	4700	268	575	121	0.083	21
X411A_39	60.9	1.5	0.562	0.018	0.78	1.779	0.057	0.783	0.016	0.79	2875	92	4189	103	4891	100	327	78	0.17	23.7
Sample 412		Bridges of Ross		GPS coordinates:			52.5914679	-9.8750846
Apatite	207U/235Pb	2 Sigma	206U/238Pb	2 Sigma	Rho	238U/206Pb	2 Sigma	207Pb/206Pb	2 Sigma	Rho	206Pb/238U (Ma)	2 Sigma (Ma)	207Pb/235U (Ma)	2 Sigma (Ma)	207Pb/206Pb (Ma)	2 Sigma (Ma)	207Pb corrected Age (Ma)	2 Sigma (Ma)	U (ppm)	% error
X412_85	1.757	0.048	0.0694	0.0014	0.18	14.41	0.29	0.1807	0.0044	0.38	432.6	8.7	1030	28	2659	65	366.5	7.7	7	2.1
X412_61	2.01	0.067	0.0791	0.0017	0.39	12.64	0.27	0.1838	0.005	0.12	491	11	1119	37	2687	73	415.1	9.3	4.1	2.2
X412_77	2.585	0.086	0.1169	0.0026	0.42	8.55	0.19	0.1618	0.0044	0.2	713	16	1296	43	2475	67	629	14	1.5	2.2
X412_30	1.893	0.081	0.1045	0.0026	0.6	9.57	0.24	0.131	0.004	-0.12	641	16	1079	46	2111	64	587	15	3	2.5
X412_63	1.398	0.056	0.0797	0.002	0.052	12.55	0.31	0.1284	0.0047	0.38	494	12	888	36	2076	76	452	11	2.8	2.5
X412_16	1.689	0.052	0.0796	0.0021	0.51	12.56	0.33	0.1542	0.0034	0.26	494	13	1004	31	2393	53	436	11	4.1	2.6
X412_12	3.15	0.12	0.114	0.0029	0.19	8.77	0.22	0.2015	0.0071	0.31	696	18	1445	55	2838	100	580	16	0.99	2.7
X412_73	3.313	0.093	0.0949	0.0025	0.32	10.54	0.28	0.2502	0.0063	0.51	584	15	1484	42	3186	80	449	13	1.1	2.8
X412_71	2.26	0.15	0.1022	0.0027	0.56	9.78	0.26	0.1612	0.0088	-0.26	627	17	1200	80	2468	135	552	16	4	2.8
X412_79	3.44	0.11	0.0845	0.0022	0.62	11.83	0.31	0.2949	0.0071	0.13	523	14	1514	48	3444	83	371	11	1.7	2.9
X412_20	5.01	0.2	0.1257	0.0032	0.43	7.96	0.2	0.2885	0.0086	0.17	763	19	1821	73	3410	102	557	16	1	2.9
X412_89	6.84	0.15	0.1208	0.0029	0.48	8.28	0.2	0.4147	0.007	0.58	735	18	2091	46	3963	67	419	12	1.3	2.9
X412_8	2.96	0.15	0.0876	0.0022	0.41	11.42	0.29	0.247	0.011	-0.05	541	14	1397	71	3166	141	417	13	1.6	3
X412_1	3.28	0.18	0.1035	0.0029	0.6	9.66	0.27	0.2294	0.0097	-0.17	635	18	1476	81	3048	129	506	16	1.7	3.1
X412_23	9.63	0.38	0.381	0.012	0.34	2.625	0.083	0.1826	0.0075	0.25	2081	66	2400	95	2677	110	1952	63	0.22	3.3
X412_50	7.81	0.2	0.1427	0.0039	0.18	7.01	0.19	0.398	0.01	0.66	860	24	2209	57	3902	98	514	18	0.48	3.5
X412_36	4.07	0.17	0.1158	0.0033	0.019	8.64	0.25	0.255	0.013	0.57	706	20	1648	69	3216	164	543	19	0.24	3.5
X412_58	8.79	0.25	0.1447	0.0035	0.11	6.91	0.17	0.438	0.012	0.62	871	21	2316	66	4045	111	476	18	0.9	3.7
X412_18	5.53	0.28	0.1111	0.0035	0.53	9	0.28	0.36	0.011	0.076	679	21	1905	96	3750	115	432	16	2.3	3.8
X412_37	5.74	0.35	0.1381	0.004	0.44	7.24	0.21	0.299	0.015	-0.083	834	24	1937	118	3465	174	601	23	1.8	3.8
X412_64	7.71	0.34	0.1549	0.0046	0.57	6.46	0.19	0.365	0.013	-0.038	928	28	2198	97	3771	134	597	23	0.73	3.9
X412_11	8.39	0.3	0.1458	0.0039	0.41	6.86	0.18	0.417	0.013	0.22	877	23	2274	81	3972	124	504	20	0.46	3.9
X412_51	6.6	0.32	0.1178	0.0034	0.69	8.49	0.25	0.4	0.013	-0.22	718	21	2059	100	3909	127	422	17	0.62	4
X412_10	5.37	0.31	0.1175	0.0039	0.67	8.51	0.28	0.326	0.013	-0.2	716	24	1880	109	3598	143	488	20	0.45	4
X412_6	4.79	0.32	0.1113	0.0035	0.72	8.98	0.28	0.32	0.016	-0.31	680	21	1783	119	3570	178	467	20	2.4	4.2
X412_69	8.18	0.28	0.1299	0.0041	0.63	7.7	0.24	0.458	0.012	0.27	787	25	2251	77	4111	108	407	18	1	4.4
X412_29	14.22	0.39	0.1861	0.0048	0.55	5.37	0.14	0.5579	0.0099	0.43	1100	28	2764	76	4402	78	440	19	0.73	4.4
X412_3	7.43	0.38	0.1497	0.0042	0.37	6.68	0.19	0.36	0.018	0.054	899	25	2165	111	3750	187	583	26	0.52	4.4
X412_66	2.99	0.13	0.0925	0.0037	0.047	10.81	0.43	0.235	0.014	0.56	570	23	1405	61	3086	184	448	20	1.8	4.5
X412_87	5.83	0.45	0.1377	0.0047	0.79	7.26	0.25	0.302	0.018	-0.24	832	28	1951	151	3481	207	596	27	0.54	4.5
X412_32	9.23	0.48	0.1576	0.0046	0.66	6.35	0.19	0.424	0.016	-0.29	943	28	2361	123	3996	151	537	25	0.27	4.6
X412_54	7.7	0.38	0.165	0.0052	-0.03	6.06	0.19	0.339	0.02	0.48	985	31	2197	108	3658	216	668	32	0.77	4.7
X412_46	13.61	0.41	0.1993	0.0057	0.51	5.02	0.14	0.501	0.014	0.38	1172	34	2723	82	4244	119	563	27	0.68	4.8
X412_22	23.99	0.58	0.2833	0.0064	0.66	3.53	0.08	0.611	0.01	0.33	1608	36	3268	79	4534	74	565	27	0.57	4.8
X412_90	5.5	0.42	0.1278	0.0051	0.5	7.82	0.31	0.315	0.019	0.024	775	31	1901	145	3546	214	541	28	0.77	5.1
X412_27	19.31	0.48	0.2437	0.0062	0.33	4.1	0.1	0.578	0.013	0.55	1406	36	3057	76	4454	100	545	29	0.57	5.3
X412_82	6.65	0.31	0.1123	0.0033	0.35	8.9	0.26	0.434	0.019	0.3	686	20	2066	96	4031	176	372	20	0.17	5.3
X412_28	7.21	0.5	0.1568	0.0056	0.57	6.38	0.23	0.341	0.023	-0.12	939	34	2138	148	3667	247	633	34	0.77	5.4
X412_80	1.4	0.2	0.07	0.0035	0.33	14.29	0.71	0.137	0.018	0.012	436	22	889	127	2190	288	393	22	1.5	5.5
X412_47	18.57	0.84	0.26	0.0089	0.65	3.85	0.13	0.515	0.016	0.14	1490	51	3020	137	4285	133	714	39	0.55	5.5
X412_39	6.23	0.48	0.1274	0.0047	0.68	7.85	0.29	0.363	0.024	-0.15	773	29	2009	155	3762	249	493	29	0.21	5.9
X412_34	11.55	0.46	0.1621	0.005	0.58	6.17	0.19	0.527	0.017	0.1	968	30	2569	102	4319	139	421	25	0.64	6
X412_59	11.32	0.69	0.1726	0.0082	0.77	5.79	0.28	0.466	0.017	0.016	1026	49	2550	155	4137	151	532	33	0.91	6.3
X412_70	5.85	0.44	0.1143	0.0052	0.18	8.75	0.4	0.364	0.027	0.51	698	32	1954	147	3767	279	441	31	0.36	6.9
X412_49	10.7	0.65	0.1773	0.0072	0.93	5.64	0.23	0.444	0.025	-0.68	1052	43	2497	152	4065	229	578	40	1	7
X412_72	8.44	0.46	0.149	0.0066	0.016	6.71	0.3	0.41	0.026	0.68	895	40	2279	124	3946	250	523	37	0.052	7
X412_55	12.88	0.54	0.1753	0.0057	0.65	5.7	0.19	0.536	0.022	-0.063	1041	34	2671	112	4343	178	444	33	1.2	7.4
X412_56	24.55	0.79	0.3011	0.0095	0.27	3.32	0.1	0.585	0.02	0.5	1697	54	3290	106	4471	153	667	50	0.15	7.5
X412_75	24.74	0.84	0.2823	0.0069	0.59	3.542	0.087	0.646	0.016	0.21	1603	39	3298	112	4615	114	480	38	0.45	7.9
X412_48	16.24	0.84	0.1952	0.0083	0.8	5.12	0.22	0.604	0.017	-0.014	1149	49	2891	150	4518	127	390	31	0.8	8
X412_5	20.82	0.93	0.258	0.01	0.38	3.88	0.15	0.579	0.023	0.45	1478	57	3130	140	4456	177	577	50	0.071	8.7
X412_9	2.38	0.29	0.12	0.011	0.88	8.33	0.76	0.1409	0.007	0.059	731	67	1237	151	2238	111	664	59	46	9
X412_17	26.6	2.8	0.455	0.02	0.67	2.2	0.1	0.433	0.044	-0.23	2417	106	3369	355	4028	409	1582	145	0.21	9.2
X412_83	15.36	0.63	0.18	0.0077	0.68	5.56	0.24	0.621	0.019	0.26	1067	46	2838	116	4558	139	333	31	0.82	9.3
X412_33	11.77	0.76	0.1611	0.0081	0.36	6.21	0.31	0.505	0.029	0.43	963	48	2586	167	4256	244	447	42	0.074	9.4
X412_81	6.93	0.54	0.1247	0.0065	0.0011	8.02	0.42	0.417	0.036	0.49	758	39	2103	164	3972	343	430	41	0.076	9.4
X412_19	10.43	0.7	0.169	0.011	0.36	5.92	0.39	0.45	0.031	0.43	1007	66	2474	166	4085	281	542	52	0.13	9.6
X412_92	10.61	0.77	0.1664	0.0078	0.31	6.01	0.28	0.456	0.036	0.19	992	47	2490	181	4105	324	526	51	0.076	9.7
X412_4	19.18	0.7	0.2278	0.0069	0.49	4.39	0.13	0.625	0.022	0.38	1323	40	3051	111	4567	161	420	41	0.52	9.8
X412_14	6.01	0.69	0.134	0.01	0.7	7.49	0.56	0.339	0.038	0.071	808	61	1977	227	3658	410	541	55	0.26	10.1
X412_42	8.08	0.61	0.1232	0.0069	0.32	8.12	0.45	0.473	0.034	0.34	749	42	2240	169	4159	299	371	38	0.062	10.3
X412_2	27.3	2.2	0.335	0.018	0.83	2.99	0.16	0.584	0.032	-0.061	1863	100	3394	274	4469	245	753	87	0.25	11.6
X412_44	50.6	1.4	0.51	0.014	0.55	1.961	0.054	0.725	0.016	0.38	2657	73	4004	111	4781	106	580	68	0.21	11.6
X412_52	25.5	1.1	0.277	0.01	0.75	3.62	0.13	0.677	0.021	0.18	1574	57	3326	144	4683	145	396	48	0.22	12.2
X412_40	32.1	2.2	0.373	0.024	0.55	2.68	0.17	0.613	0.031	0.28	2044	131	3553	244	4539	230	759	96	0.12	12.7
X412_74	45.8	2.4	0.468	0.019	0.84	2.137	0.087	0.71	0.02	0.061	2475	100	3905	205	4751	134	586	76	0.43	13
X412_53	16.2	1.6	0.209	0.016	0.63	4.78	0.37	0.54	0.036	0.36	1223	94	2889	285	4354	290	527	69	0.14	13.1
X412_45	19.8	2.7	0.261	0.028	0.94	3.83	0.41	0.542	0.031	-0.6	1495	160	3082	420	4360	249	662	91	1.7	13.8
X412_62	32.3	1.3	0.349	0.01	0.17	2.869	0.082	0.669	0.028	0.5	1928	55	3559	143	4666	195	539	76	0.68	14.1
X412_38	21.2	1.5	0.241	0.016	0.81	4.15	0.28	0.646	0.027	0.22	1392	92	3148	223	4615	193	404	57	0.31	14.1
X412_60	10.92	0.81	0.1434	0.0098	0.49	6.97	0.48	0.543	0.04	0.51	864	59	2516	187	4362	321	353	50	0.13	14.2
X412_43	8.41	0.68	0.1249	0.0077	0.007	8.01	0.49	0.487	0.049	0.46	759	47	2276	184	4202	423	362	52	0.051	14.3
X412_24	16.1	1.6	0.222	0.013	0.19	4.5	0.26	0.529	0.047	0.48	1292	76	2883	286	4324	384	581	84	0.32	14.5
X412_68	7.61	0.66	0.1219	0.0081	0.006	8.2	0.55	0.465	0.053	0.53	741	49	2186	190	4134	471	374	55	0.055	14.7
X412_78	7.57	0.77	0.1146	0.0084	0.1	8.73	0.64	0.477	0.058	0.47	699	51	2181	222	4172	507	341	57	0.044	16.6
X412_21	128.3	8.6	1.206	0.071	0.93	0.829	0.049	0.78	0.022	0.23	5100	300	4937	331	4886	138	1186	201	0.11	16.9
X412_15	38.6	2	0.381	0.016	0.7	2.62	0.11	0.724	0.025	0.15	2081	87	3735	194	4779	165	410	77	0.16	18.8
X412_25	47	2.7	0.482	0.027	0.72	2.07	0.12	0.706	0.033	0.38	2536	142	3931	226	4743	222	626	123	0.071	19.7
X412_86	11.8	1.2	0.146	0.012	0.47	6.85	0.56	0.576	0.053	0.47	879	72	2589	263	4449	409	321	65	0.072	20.3
Sample 413A		Bridges of Ross		GPS coordinates:			52.5914679	-9.8750846
Apatite	207U/235Pb	2 Sigma	206U/238Pb	2 Sigma	Rho	238U/206Pb	2 Sigma	207Pb/206Pb	2 Sigma	Rho	206Pb/238U (Ma)	2 Sigma (Ma)	207Pb/235U (Ma)	2 Sigma (Ma)	207Pb/206Pb (Ma)	2 Sigma (Ma)	207Pb corrected Age (Ma)	2 Sigma (Ma)	U (ppm)	% error
X413A_33	0.993	0.029	0.0779	0.0015	0.76	12.83	0.25	0.0929	0.0024	-0.53	483.8	9.3	700	20	1486	38	462.7	8.8	4.4	1.9
X413A_15	2.877	0.072	0.1127	0.0026	0.27	8.87	0.2	0.1871	0.0043	0.52	688	16	1376	34	2717	62	586	14	2.4	2.3
X413A_57	3.47	0.1	0.1083	0.0025	0.57	9.23	0.21	0.2367	0.0044	0.19	663	15	1520	43	3098	58	523	12	4.4	2.4
X413A_18	6.21	0.15	0.1317	0.0032	0.74	7.59	0.18	0.3455	0.0045	0.42	798	19	2006	48	3687	48	527	14	2.3	2.6
X413A_16	2.078	0.076	0.0799	0.0021	0.36	12.52	0.33	0.1882	0.0058	0.18	496	13	1142	42	2726	84	417	11	1.2	2.7
X413A_27	2.26	0.14	0.1089	0.0028	0.62	9.18	0.24	0.156	0.0082	-0.27	666	17	1200	74	2413	127	591	16	2.2	2.7
X413A_58	4.19	0.16	0.1232	0.003	-0.026	8.12	0.2	0.2464	0.0094	0.51	749	18	1672	64	3162	121	585	16	0.65	2.8
X413A_45	3.14	0.13	0.1196	0.0033	0.49	8.36	0.23	0.1889	0.0068	0.036	728	20	1443	60	2733	98	619	18	1.4	2.9
X413A_20	3.64	0.13	0.0864	0.002	0.32	11.57	0.27	0.3069	0.0094	0.2	534	12	1558	56	3505	107	371	11	2	2.9
X413A_2	4.04	0.19	0.1239	0.0033	0.28	8.07	0.21	0.236	0.01	0.13	753	20	1642	77	3093	130	598	18	0.27	3
X413A_55	1.723	0.057	0.0841	0.0025	-0.071	11.89	0.35	0.1514	0.0064	0.67	521	15	1017	34	2362	100	462	14	3.8	3
X413A_37	4.88	0.17	0.098	0.0023	0.55	10.2	0.24	0.362	0.01	0.031	603	14	1799	63	3760	101	379	12	3	3.1
X413A_25	23.41	0.84	0.495	0.014	0.39	2.02	0.057	0.345	0.01	0.27	2592	73	3244	116	3686	104	2037	65	0.19	3.2
X413A_5	7.6	0.24	0.1543	0.0041	0.24	6.48	0.17	0.357	0.011	0.48	925	25	2185	69	3737	115	604	20	0.41	3.4
X413A_36	2.75	0.19	0.083	0.0027	0.82	12.05	0.39	0.242	0.01	-0.57	514	17	1342	93	3133	129	398	14	5.5	3.6
X413A_50	7.98	0.35	0.1556	0.0044	0.65	6.43	0.18	0.376	0.012	-0.15	932	26	2229	98	3816	122	587	22	0.44	3.7
X413A_39	8.74	0.39	0.1708	0.0051	0.57	5.85	0.17	0.369	0.012	-0.029	1017	30	2311	103	3787	123	654	24	0.8	3.7
X413A_40	5.18	0.19	0.1047	0.0029	0.29	9.55	0.26	0.356	0.014	0.32	642	18	1849	68	3733	147	410	16	0.4	3.9
X413A_17	7.55	0.33	0.1516	0.0041	0.13	6.6	0.18	0.359	0.015	0.39	910	25	2179	95	3746	157	591	23	0.55	3.9
X413A_47	8.18	0.34	0.1594	0.0048	0.17	6.27	0.19	0.38	0.015	0.49	953	29	2251	94	3832	151	596	25	0.23	4.2
X413A_22	6.76	0.3	0.1158	0.0032	0.63	8.64	0.24	0.422	0.014	-0.19	706	20	2081	92	3989	132	395	17	1	4.2
X413A_12	7.69	0.53	0.2167	0.0091	0.82	4.61	0.19	0.255	0.009	-0.34	1264	53	2195	151	3218	116	1009	43	1.9	4.3
X413A_51	1.84	0.12	0.0774	0.0032	0.63	12.92	0.53	0.177	0.01	-0.14	481	20	1060	69	2625	148	410	18	2.2	4.3
X413A_3	8.4	0.41	0.1614	0.0045	0.26	6.2	0.17	0.376	0.017	0.32	965	27	2275	111	3816	173	609	26	0.63	4.3
X413A_44	10.32	0.37	0.1803	0.0058	0.39	5.55	0.18	0.416	0.014	0.37	1069	34	2464	88	3968	134	626	27	0.39	4.4
X413A_48	9.19	0.56	0.1535	0.0049	0.74	6.51	0.21	0.432	0.018	-0.37	921	29	2357	144	4024	168	513	26	0.54	5.2
X413A_41	8.52	0.42	0.1391	0.0046	0.46	7.19	0.24	0.453	0.018	0.2	840	28	2288	113	4095	163	441	24	1.3	5.5
X413A_29	5.45	0.32	0.1452	0.0068	0.27	6.89	0.32	0.274	0.02	0.22	874	41	1893	111	3329	243	659	37	0.8	5.6
X413A_6	14.12	0.36	0.1692	0.0038	0.47	5.91	0.13	0.61	0.012	0.42	1008	23	2758	70	4532	89	327	19	0.63	5.8
X413A_43	49.1	2.5	0.724	0.035	0.59	1.381	0.067	0.497	0.021	0.41	3511	170	3974	202	4232	179	2362	154	0.035	6.5
X413A_1	21.43	0.73	0.2705	0.0083	0.4	3.7	0.11	0.58	0.018	0.34	1543	47	3158	108	4459	138	605	41	0.49	6.9
X413A_19	12.07	0.61	0.1688	0.0058	0.66	5.92	0.2	0.529	0.02	-0.1	1005	35	2610	132	4324	163	437	30	0.41	6.9
X413A_8	9.94	0.62	0.1583	0.0076	0.72	6.32	0.3	0.449	0.022	-0.23	947	45	2429	152	4082	200	508	36	0.091	7
X413A_9	3.58	0.42	0.1006	0.0051	0.14	9.94	0.5	0.258	0.031	0.27	618	31	1545	181	3235	389	470	33	0.069	7
X413A_31	11.27	0.79	0.1602	0.0074	0.91	6.24	0.29	0.512	0.022	-0.35	958	44	2546	178	4276	184	435	34	0.5	7.7
X413A_34	18.46	0.93	0.2203	0.0076	0.8	4.54	0.16	0.599	0.019	-0.29	1283	44	3014	152	4506	143	452	36	0.7	8
X413A_7	7.4	0.63	0.1226	0.0065	0.24	8.16	0.43	0.42	0.033	0.36	746	40	2161	184	3982	313	420	38	0.069	9
X413A_53	21.7	1.1	0.267	0.013	0.61	3.75	0.18	0.588	0.022	0.39	1526	74	3170	161	4479	168	580	52	0.18	9
X413A_56	13.8	1.2	0.198	0.012	0.9	5.05	0.31	0.502	0.026	-0.47	1165	71	2736	238	4247	220	558	51	0.26	9.1
X413A_30	5.65	0.55	0.1172	0.0074	0.25	8.53	0.54	0.367	0.039	0.26	714	45	1924	187	3779	402	449	44	0.057	9.9
X413A_49	32.22	0.98	0.3337	0.0088	0.49	2.997	0.079	0.69	0.016	0.31	1856	49	3557	108	4710	109	452	45	0.19	10
X413A_11	19	1.8	0.259	0.021	0.92	3.86	0.31	0.532	0.028	0.28	1485	120	3042	288	4332	228	677	75	0.47	11.1
X413A_23	21.32	0.89	0.2342	0.0084	0.14	4.27	0.15	0.649	0.026	0.52	1356	49	3153	132	4622	185	386	50	0.15	12.9
X413A_26	9.11	0.82	0.1402	0.0085	0.27	7.13	0.43	0.483	0.045	0.33	846	51	2349	211	4190	390	412	54	0.071	13.1
X413A_46	9.79	0.75	0.1453	0.0096	0.25	6.88	0.45	0.507	0.047	0.53	875	58	2415	185	4262	395	400	58	0.081	14.6
X413A_32	11.72	0.84	0.16	0.012	0.44	6.25	0.47	0.548	0.041	0.44	957	72	2582	185	4376	327	389	58	0.031	14.9
X413A_35	17.3	1.2	0.225	0.01	0.26	4.45	0.2	0.575	0.043	0.35	1307	58	2952	205	4446	332	506	76	0.23	15
X413A_42	10.7	1.1	0.1549	0.0087	-0.048	6.46	0.36	0.52	0.062	0.56	928	52	2497	257	4299	513	411	76	0.05	18.6
X413A_28	41.8	3	0.441	0.024	0.54	2.27	0.12	0.676	0.038	0.45	2355	128	3814	274	4681	263	680	128	0.19	18.8
X413A_52	18.8	1.7	0.225	0.016	0.44	4.44	0.32	0.597	0.049	0.14	1308	93	3032	274	4501	369	466	89	0.16	19.2
X413A_54	10.24	0.87	0.1337	0.007	-0.009	7.48	0.39	0.549	0.059	0.57	809	42	2457	209	4378	471	322	63	0.045	19.6
X413A_13	15.6	1.2	0.194	0.011	0.25	5.15	0.29	0.591	0.053	0.55	1143	65	2853	219	4486	402	408	82	0.073	20
X413A_24	33.5	2.5	0.402	0.023	0.41	2.49	0.14	0.658	0.05	0.48	2178	125	3595	268	4642	353	673	151	0.095	22.5
Sample 414B		Bridges of Ross		GPS coordinates:			52.5914679	-9.8750846
Apatite	207U/235Pb	2 Sigma	206U/238Pb	2 Sigma	Rho	238U/206Pb	2 Sigma	207Pb/206Pb	2 Sigma	Rho	206Pb/238U (Ma)	2 Sigma (Ma)	207Pb/235U (Ma)	2 Sigma (Ma)	207Pb/206Pb (Ma)	2 Sigma (Ma)	207Pb corrected Age (Ma)	2 Sigma (Ma)	U (ppm)	% error
X414B_26	1.738	0.07	0.0784	0.0017	0.013	12.76	0.28	0.1592	0.0061	0.32	487	11	1023	41	2447	94	426	10	0.84	2.3
X414B_33	2.341	0.068	0.1117	0.0026	0.57	8.95	0.21	0.1526	0.0032	0.19	683	16	1225	36	2375	50	609	14	5.2	2.3
X414B_85	3.51	0.11	0.163	0.0039	0.32	6.13	0.15	0.1574	0.0049	0.31	973	23	1530	48	2428	76	876	21	0.9	2.4
X414B_19	2.08	0.093	0.076	0.0017	0.69	13.16	0.29	0.1991	0.0066	-0.42	472	11	1142	51	2819	93	390.1	9.4	5.4	2.4
X414B_52	3.3	0.11	0.0864	0.0019	0.5	11.57	0.25	0.2775	0.0066	-0.13	534	12	1482	49	3349	80	391	10	3.2	2.5
X414B_77	4.19	0.11	0.1011	0.0024	0.64	9.89	0.23	0.302	0.0053	0.14	621	15	1673	44	3481	61	438	11	2.4	2.5
X414B_32	4.13	0.17	0.1361	0.0033	0.4	7.35	0.18	0.2178	0.0069	0.05	823	20	1660	68	2964	94	674	17	1.1	2.6
X414B_69	3.86	0.12	0.1045	0.0024	0.19	9.57	0.22	0.2658	0.0077	0.37	641	15	1605	50	3281	95	482	13	2.4	2.6
X414B_49	3.29	0.11	0.0842	0.0018	-0.042	11.88	0.25	0.2856	0.0092	0.092	521	11	1479	49	3394	109	376	10	2.5	2.7
X414B_102	3.14	0.12	0.1182	0.003	0.24	8.46	0.21	0.1973	0.0071	0.34	720	18	1443	55	2804	101	605	16	0.9	2.7
X414B_105	2.4	0.13	0.1113	0.003	0.21	8.98	0.24	0.1576	0.0081	0.18	680	18	1243	67	2430	125	603	17	0.47	2.8
X414B_92	3.38	0.14	0.1248	0.0035	0.058	8.01	0.22	0.1919	0.0073	0.46	758	21	1500	62	2759	105	643	19	0.86	2.9
X414B_95	10.95	0.3	0.1878	0.0041	0.4	5.32	0.12	0.426	0.01	0.21	1109	24	2519	69	4002	90	639	20	0.73	3.1
X414B_22	5.26	0.23	0.1355	0.004	0.44	7.38	0.22	0.286	0.01	0.14	819	24	1862	81	3398	117	603	20	0.78	3.3
X414B_75	6.98	0.26	0.1431	0.0037	0.5	6.99	0.18	0.349	0.012	0.015	862	22	2109	79	3703	127	569	19	3.4	3.4
X414B_65	3.2	0.19	0.085	0.0024	0.91	11.76	0.33	0.272	0.012	-0.7	526	15	1457	87	3318	146	388	13	3.6	3.4
X414B_44	3.31	0.33	0.1214	0.0035	0.8	8.24	0.24	0.195	0.014	-0.55	739	21	1483	148	2785	200	623	21	0.75	3.4
X414B_51	4.91	0.31	0.1332	0.0038	0.67	7.51	0.21	0.267	0.014	-0.28	806	23	1804	114	3288	172	612	22	0.33	3.6
X414B_66	6.29	0.31	0.1351	0.0036	0.54	7.4	0.2	0.337	0.014	-0.19	817	22	2017	99	3649	152	549	20	1.3	3.7
X414B_89	6.53	0.29	0.1138	0.0034	0.86	8.79	0.26	0.419	0.01	-0.32	695	21	2050	91	3979	95	390	15	1.5	3.8
X414B_86	5.65	0.31	0.1092	0.0031	0.84	9.16	0.26	0.368	0.013	-0.41	668	19	1924	106	3783	134	418	16	2.2	3.8
X414B_108	10.17	0.32	0.1491	0.0039	0.7	6.71	0.18	0.492	0.01	0.016	896	23	2450	77	4217	86	428	17	1.1	3.9
X414B_29	4.66	0.26	0.1067	0.0036	0.69	9.37	0.32	0.317	0.012	-0.22	654	22	1760	98	3555	135	450	18	2.8	4
X414B_42	6.99	0.29	0.1515	0.0052	0.64	6.6	0.23	0.334	0.012	-0.054	909	31	2110	88	3636	131	619	25	0.4	4
X414B_35	5.45	0.23	0.1076	0.0035	0.47	9.29	0.3	0.371	0.013	0.19	659	21	1893	80	3796	133	409	17	0.99	4.2
X414B_43	13.37	0.48	0.2025	0.0054	0.39	4.94	0.13	0.47	0.013	0.29	1189	32	2706	97	4150	115	621	26	0.16	4.2
X414B_62	4.58	0.28	0.1147	0.004	0.66	8.72	0.3	0.287	0.016	-0.1	700	24	1746	107	3401	190	510	22	0.45	4.4
X414B_74	5.99	0.32	0.1407	0.0042	-0.12	7.11	0.21	0.306	0.019	0.53	849	25	1974	105	3501	217	605	26	0.38	4.4
X414B_31	3.67	0.43	0.1319	0.0056	0.62	7.58	0.32	0.192	0.017	-0.28	799	34	1565	183	2759	244	679	32	1.2	4.8
X414B_72	15.45	0.55	0.228	0.0065	0.39	4.39	0.13	0.49	0.015	0.39	1324	38	2843	101	4211	129	667	32	0.16	4.8
X414B_3	1.53	0.12	0.0837	0.0041	0.77	11.95	0.59	0.1304	0.0061	-0.17	518	25	942	74	2103	98	473	23	15	4.9
X414B_25	9.25	0.42	0.1667	0.0052	-0.041	6	0.19	0.402	0.022	0.59	994	31	2363	107	3917	214	596	33	0.27	5.5
X414B_68	12.02	0.58	0.1855	0.0061	0.74	5.39	0.18	0.47	0.018	-0.28	1097	36	2606	126	4150	159	568	31	0.71	5.5
X414B_91	20.29	0.94	0.315	0.012	0.43	3.17	0.12	0.476	0.021	0.46	1765	67	3105	144	4169	184	970	59	0.33	6.1
X414B_80	12.58	0.45	0.1684	0.0047	0.3	5.94	0.17	0.535	0.018	0.39	1003	28	2649	95	4341	146	428	27	0.68	6.2
X414B_54	7.66	0.61	0.1436	0.0076	0.91	6.96	0.37	0.385	0.018	-0.39	865	46	2192	175	3852	180	531	34	1.7	6.3
X414B_6	4.62	0.38	0.1121	0.0051	0.088	8.92	0.41	0.3	0.027	0.41	685	31	1753	144	3470	312	487	31	0.093	6.4
X414B_16	18.37	0.78	0.2393	0.0078	0.47	4.18	0.14	0.565	0.019	0.3	1383	45	3009	128	4420	149	560	39	0.18	7
X414B_87	15.47	0.51	0.1926	0.0053	0.34	5.19	0.14	0.579	0.018	0.35	1135	31	2845	94	4456	139	424	30	0.77	7
X414B_34	15.5	1	0.218	0.0088	0.74	4.59	0.19	0.519	0.022	-0.26	1271	51	2846	184	4296	182	587	43	0.82	7.3
X414B_45	11.42	0.77	0.1747	0.0077	0.56	5.72	0.25	0.476	0.025	0.18	1038	46	2558	172	4169	219	526	40	0.092	7.6
X414B_71	12.4	1.1	0.2	0.011	0.85	5	0.28	0.448	0.025	-0.42	1175	65	2635	234	4079	228	647	51	0.2	7.8
X414B_83	26.7	1.2	0.299	0.011	0.86	3.35	0.12	0.649	0.015	-0.14	1684	62	3373	152	4622	107	503	40	0.98	8.1
X414B_90	14.81	0.81	0.236	0.012	0.3	4.24	0.22	0.462	0.029	0.53	1366	69	2803	153	4124	259	742	62	0.21	8.3
X414B_12	6.35	0.88	0.1321	0.0085	0.85	7.57	0.49	0.333	0.03	-0.58	800	51	2025	281	3631	327	541	45	3	8.3
X414B_79	21.6	1.7	0.283	0.017	0.83	3.53	0.21	0.549	0.023	0.066	1606	97	3166	249	4378	183	706	63	0.46	9
X414B_59	14.89	0.91	0.1801	0.0079	0.88	5.55	0.24	0.591	0.022	-0.015	1068	47	2808	172	4486	167	377	35	0.13	9.3
X414B_63	19.59	0.67	0.2249	0.0061	0.23	4.45	0.12	0.629	0.021	0.45	1308	35	3071	105	4576	153	407	39	0.65	9.5
X414B_14	23.4	1.3	0.2638	0.0094	0.76	3.79	0.14	0.638	0.02	-0.25	1509	54	3244	180	4597	144	463	45	0.21	9.6
X414B_58	21.16	0.77	0.2418	0.0091	0.82	4.14	0.16	0.636	0.021	0.54	1396	53	3146	114	4592	152	426	43	0.18	10.1
X414B_53	23.15	0.56	0.2469	0.0066	0.13	4.05	0.11	0.671	0.018	0.69	1422	38	3233	78	4670	125	363	37	0.17	10.3
X414B_109	18.15	0.71	0.2171	0.0079	0.48	4.61	0.17	0.622	0.023	0.3	1267	46	2998	117	4560	169	404	42	0.11	10.3
X414B_20	18.5	1.2	0.235	0.014	0.8	4.26	0.25	0.579	0.025	0.048	1361	81	3016	196	4456	192	523	54	0.79	10.3
X414B_39	6.89	0.88	0.136	0.01	0.43	7.35	0.54	0.371	0.039	0.027	822	60	2097	268	3796	399	518	54	0.15	10.5
X414B_84	10	1.2	0.155	0.012	0.83	6.45	0.5	0.459	0.032	-0.17	929	72	2435	292	4115	287	485	52	0.22	10.8
X414B_67	32.7	1	0.368	0.013	0.15	2.72	0.1	0.652	0.024	0.66	2020	71	3573	109	4628	170	627	70	0.085	11.2
X414B_5	24.6	1.2	0.291	0.011	0.3	3.44	0.13	0.617	0.028	0.41	1647	62	3292	161	4549	206	567	65	0.14	11.4
X414B_99	26.9	2.6	0.3	0.024	0.92	3.33	0.27	0.64	0.024	-0.24	1691	135	3380	327	4602	173	529	69	0.2	13
X414B_28	5.03	0.66	0.105	0.009	0.57	9.52	0.82	0.358	0.053	0.25	644	55	1824	239	3741	554	410	55	0.065	13.3
X414B_98	20.5	2.3	0.255	0.016	0.92	3.92	0.25	0.581	0.036	-0.66	1464	92	3115	350	4461	276	566	77	2.9	13.6
X414B_100	7.51	0.51	0.1135	0.0073	-0.062	8.81	0.57	0.489	0.045	0.69	693	45	2174	148	4208	387	327	45	0.051	13.6
X414B_37	24.8	2.5	0.273	0.021	0.9	3.66	0.28	0.657	0.025	-0.07	1556	120	3300	333	4639	177	437	63	0.77	14.3
X414B_57	7.18	0.64	0.1116	0.0085	0.26	8.96	0.68	0.483	0.047	0.46	682	52	2134	190	4190	408	326	47	0.049	14.5
X414B_106	132	11	1.263	0.097	0.89	0.79	0.06	0.761	0.025	0.068	5265	404	4966	414	4850	159	1671	245	1.2	14.6
X414B_82	9.3	1.3	0.144	0.014	0.86	6.94	0.68	0.495	0.043	-0.16	867	84	2368	331	4226	367	410	61	0.41	15
X414B_76	69.5	5.9	0.677	0.039	0.85	1.477	0.085	0.717	0.026	0.011	3333	192	4321	367	4765	173	895	137	0.22	15.3
X414B_10	37.3	1.9	0.376	0.016	0.6	2.66	0.11	0.707	0.023	0.3	2058	88	3702	189	4745	154	461	70	0.092	15.3
X414B_101	11.74	0.98	0.169	0.01	0.29	5.91	0.35	0.507	0.053	0.6	1008	60	2584	216	4262	446	467	73	0.092	15.6
X414B_104	22.8	2.7	0.274	0.025	0.9	3.65	0.33	0.614	0.034	-0.31	1561	142	3218	381	4541	251	538	85	0.15	15.8
X414B_64	31.7	1.7	0.342	0.016	0.65	2.92	0.14	0.681	0.029	0.34	1896	89	3541	190	4691	200	491	79	0.13	16.1
X414B_47	18.6	1.6	0.228	0.015	0.59	4.39	0.29	0.589	0.042	0.28	1324	87	3021	260	4481	320	488	79	0.089	16.1
X414B_88	15.2	1.5	0.188	0.013	0.59	5.32	0.37	0.593	0.04	0.26	1111	77	2828	279	4491	303	392	64	0.021	16.2
X414B_96	100.1	3.3	0.945	0.033	0.72	1.058	0.037	0.771	0.02	0.3	4289	150	4687	155	4869	126	863	145	0.064	16.8
X414B_21	24.7	4	0.288	0.033	0.93	3.47	0.4	0.597	0.042	-0.52	1632	187	3296	534	4501	317	608	112	0.16	18.5
X414B_40	60.7	2.1	0.575	0.019	0.8	1.739	0.057	0.773	0.016	0.094	2928	97	4186	145	4873	101	398	79	0.46	19.7
X414B_1	15.6	3.9	0.196	0.027	0.77	5.1	0.7	0.539	0.052	-0.24	1154	159	2853	713	4352	420	494	101	0.15	20.5
X414B_50	10.5	1	0.134	0.016	0.65	7.46	0.89	0.549	0.053	0.47	811	97	2480	236	4378	423	323	67	0.06	20.7
X414B_94	201	20	1.79	0.17	0.95	0.559	0.053	0.81	0.025	-0.023	6614	628	5390	536	4939	152	1649	342	0.091	20.7
X414B_38	22.1	2	0.241	0.016	0.68	4.15	0.28	0.663	0.04	0.23	1392	92	3188	289	4653	281	369	78	0.082	21.2
X414B_9	18.5	1.8	0.229	0.017	0.45	4.37	0.32	0.58	0.06	0.49	1329	99	3016	293	4459	461	507	109	0.045	21.5
X414B_27	72.5	3.3	0.692	0.02	0.43	1.445	0.042	0.755	0.028	0.26	3390	98	4363	199	4839	179	651	147	0.08	22.6
X414B_61	36.8	2.3	0.381	0.024	0.84	2.62	0.17	0.719	0.032	0.27	2081	131	3688	231	4769	212	427	98	0.076	22.9
X414B_110	45.8	1.8	0.451	0.018	0.53	2.217	0.088	0.746	0.026	0.48	2400	96	3905	153	4822	168	408	94	0.27	23
X414B_13	154	24	1.49	0.25	0.98	0.67	0.11	0.795	0.023	-0.058	5881	987	5121	798	4913	142	1455	335	0.12	23
X414B_23	294	12	2.74	0.13	0.75	0.365	0.017	0.789	0.024	0.29	8503	403	5774	236	4902	149	2304	534	0.02	23.2
X414B_48	32.5	2.1	0.346	0.022	0.42	2.89	0.18	0.681	0.043	0.44	1915	122	3566	230	4691	296	498	116	0.06	23.4
X414B_78	28	2.1	0.3	0.015	0.42	3.33	0.17	0.671	0.046	0.29	1691	85	3419	256	4670	320	450	107	0.12	23.8
X414B_60	84.8	4.3	0.804	0.036	0.53	1.244	0.056	0.754	0.034	0.22	3803	170	4521	229	4837	218	821	201	0.041	24.49163995
2 Sigma are abs.
Rho = error correlation
